# Supplementary material for: Activating nickel foam with trace titanium oxide for enhanced water oxidation
Source: Royal Society of Chemistry journal article supplement (doi:10.1039/d3cc05956a), 2024-01-01
Supplement: d3cc05956a1.pdf [file d3cc05956a1.pdf]

## Electronic Supporting Information

### Activating Nickel Foam with Trace Titanium Oxide for Enhanced Water Oxidation

| <b>Table of Content:</b>           | <b>Page</b> |
|------------------------------------|-------------|
| 1. Experimental Section            | <b>2</b>    |
| 2. Supporting experimental results | <b>5</b>    |
| 3. Table S1                        | <b>17</b>   |
| 4. References                      | <b>18</b>   |

## 1. Experimental Section:

**Chemicals and reagents.** Butyl titanate (98%, Sinopharm Chemical Reagent Co., Ltd), KOH (99.99%, Aladdin), Ni foam (99.9%, Kunshan Guangjiayuan New Material Co., Ltd), HF solution (40%, Macklin), ethanol (Sinopharm Chemical Reagent Co., Ltd). Ultrapure water was used in this work. Ni foam (NF) was used after sonication in acetone, ethanol, and 0.1 M HCl solution for 15 min, respectively. Ultrapure water was used.

**Synthesis of TiO<sub>2</sub> nanosheets.** TiO<sub>2</sub> nanosheets were synthesized using a modified hydrothermal method.<sup>1</sup> Briefly, 25 mL butyl titanate was dropped into 15 mL HF solution (24 wt.%) with stirring. After stirring for 30 min, the solution was transferred into a 50 mL hydrothermal autoclave reactor, and heated at 180 °C for 24 h. The white powder was obtained by washing with ethanol and water for three times, respectively, and finally dried at 60 °C overnight.

**Synthesis of TiO<sub>2</sub>@NF (prepared Ti-Ni).** In a typical experiment, 1 mg TiO<sub>2</sub> nanosheets were dispersed in 1 mL water with sonication. 15 μg cm<sup>-2</sup> of ink was dropped on freshly washed NF and dried under IR lamp. To anchoring TiO<sub>2</sub> nanosheets on NF, they were heated in the air at 400 °C for 5 h. The bare NF that heated under the same program was denoted as the annealed NF.

**Synthesis of activated Ti-Ni.** Activated Ti-Ni was derived from electrochemical activation of prepared Ti-Ni in an alkaline flow cell for carbon dioxide reduction, in which prepared Ti-Ni anode shared the same geometric size as cathode and HgO was the reference electrode. The catholyte and anolyte were 1 M KOH and was recirculating with the flow

rate of 5 mL min<sup>-1</sup>. Activated Ti-Ni was obtained after the three-electrode electrolysis, which was conducted at a series of constant current densities of 50, 100, 150, 200, and 250 mA cm<sup>-2</sup>.

**Characterization.** Scanning electron microscope (SEM) image was obtained using a field emission scanning electron microscope (S 4800, Hitachi). X-ray power diffraction (XRD) pattern of TiO<sub>2</sub> nanosheets was recorded on a X'Pert Pro (PANalytical). The chemical valence of the materials was characterized by X-ray photoelectron spectroscopy (Axis Supra, Shimadzu). The specific correction was done by employing the C 1s binding energy of 284.8 eV. Raman spectra were collected by a Raman spectrometer (LabRAM Aramis, Horiba Jobin Yvon S.A.S.).

#### **Electrochemical measurements.**

Electrocatalytic water oxidation activity and durability were conducted by an electrochemical work station (CHI 660E) with the three-electrode system in a single reactor. The counter electrode is a Pt plate (2 cm × 2 cm), and the reference electrode was HgO (1 M KOH). The water oxidation LSV was carried out at a scan rate of 5 mV s<sup>-1</sup>. The double layer capacitance ( $C_{dl}$ ) was evaluated in the range of non-Faradaic zone. And the electrochemical active surface area (ECSA) values were calculated from the measured double layer capacitance divided by the specific capacitance of an atomically smooth material ( $C_{dl}'$ , ~40  $\mu\text{F cm}^{-2}$ ) in 1.0 M KOH:  $\text{ECSA} = C_{dl} / C_{dl}' \times S$ , where S is the actual surface area of the electrode.<sup>2,3</sup> Electrochemical impedance spectroscopy (EIS) was conducted in the frequency range from 0.1 Hz to 1 MHz at 0.6 V vs HgO. The stability test was conducted

at the constant current density of 10 mA cm<sup>-2</sup>. All the potentials reported in the work are with iR correction unless otherwise specified, which are given versus reversible hydrogen electrode (RHE) according to  $E_{\text{RHE}} = E_{\text{HgO}} + 0.098 \text{ V} + 0.0591 \times \text{pH}$ . The electrolyte was 1 M KOH, of which the experimental pH was 13.5 according to the reference.<sup>4</sup> To comparison, the same loading mass of IrO<sub>2</sub> nanoparticles was anchored on NF.

### ***In-situ* Raman spectroscopy.**

All *in-situ* Raman spectroscopy tests were conducted at a Raman spectrometer (LabRAM Aramis, Horiba Jobin Yvon S.A.S.). Laser excitation was conducted at 532 nm. Prior to use, the Raman shift range was calibrated using the  $520.6 \pm 0.5 \text{ cm}^{-1}$  peak of silicon. The working electrode was contacted with a Pt electrode holder and then assembled to the custom-made electrochemical cell.

## 2. Supporting experimental results:

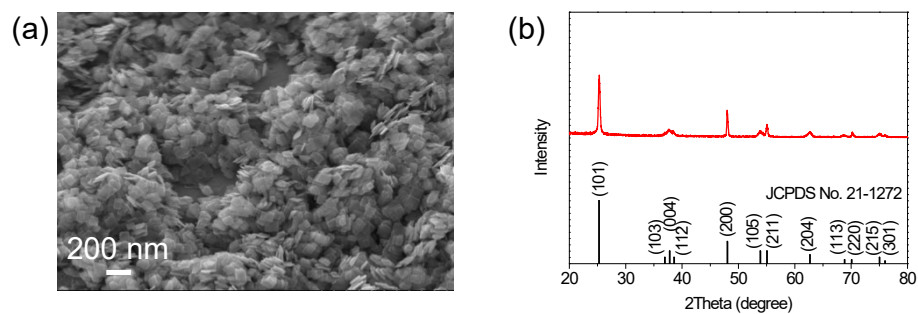

Figure S1. (a) SEM and (b) XRD of  $\text{TiO}_2$  nanosheets.

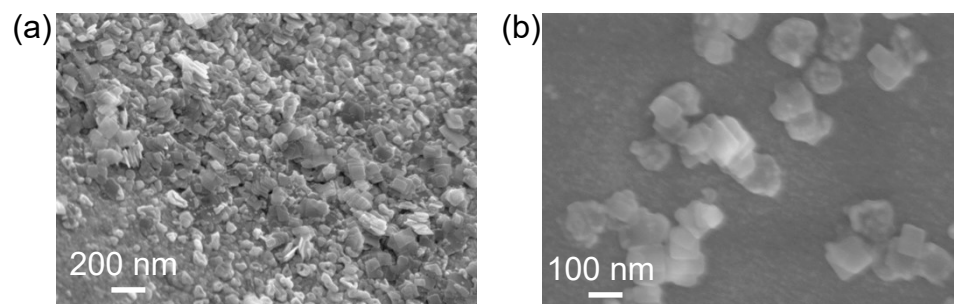

Figure S2. SEM images of prepared Ti-Ni.

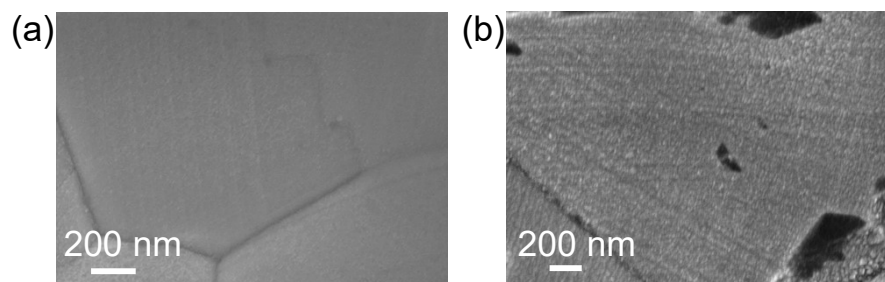

Figure S3. SEM image of (a) bare NF and (b) annealed NF.

The rough surface of prepared Ti-Ni in Figure S2 came from the surface change of NF itself during heat treatment. In this case, bare NF sample for Figure S3(a) was washed with alcohols only.

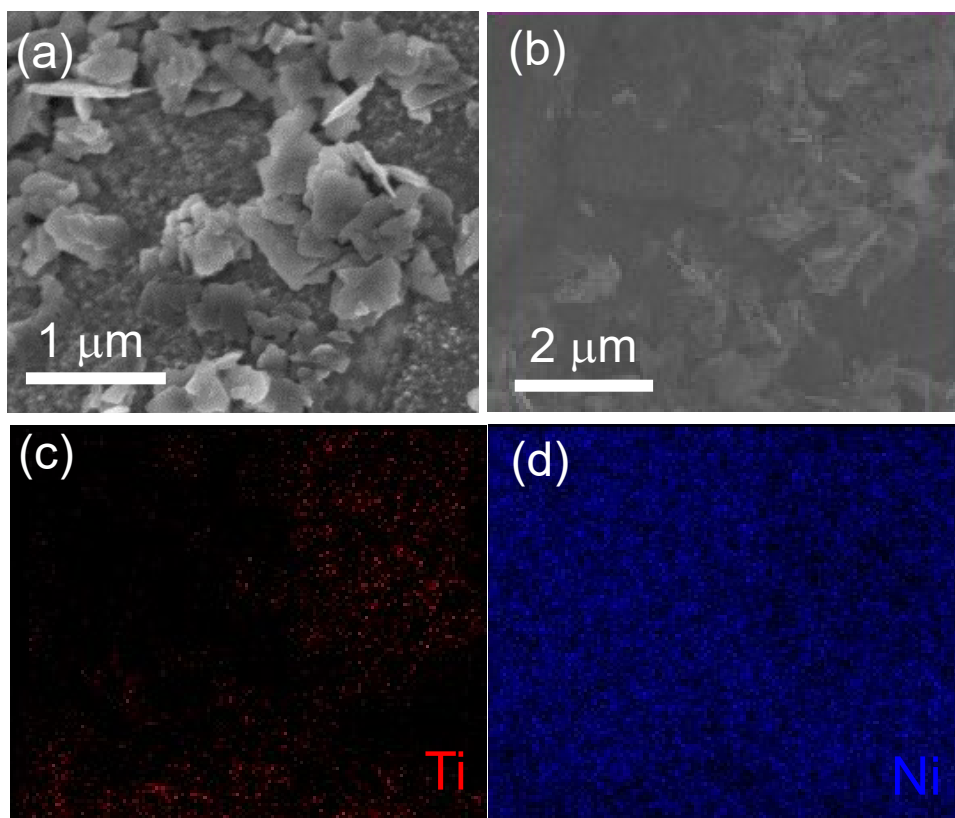

Figure S4. (a and b) SEM images and (c and d) corresponding mapping of the activated Ti-Ni.

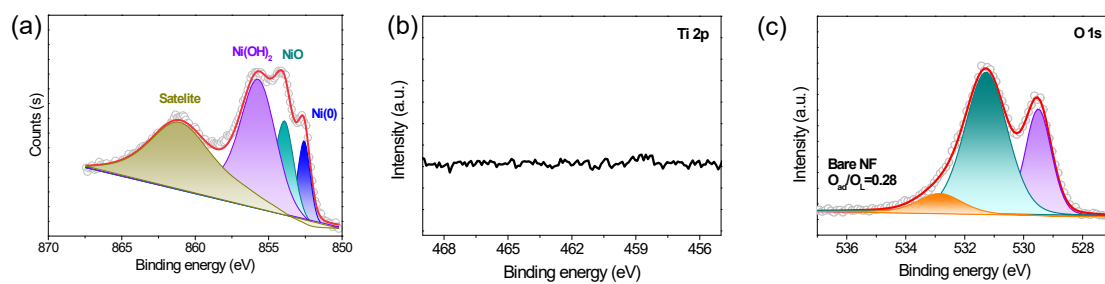

Figure S5. XPS spectra of bare NF. (a) Ni 2p, (b) Ti 2p, and (c) O 1s.

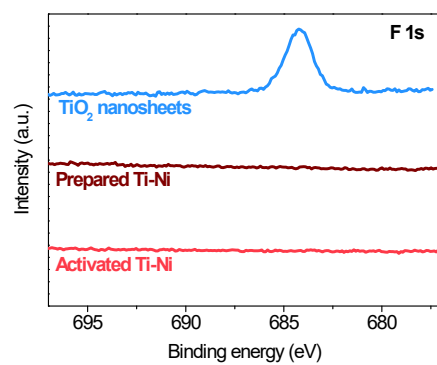

Figure S6. F 1s XPS spectra for TiO<sub>2</sub> nanosheets, prepared Ti-Ni, and activated Ti-Ni.

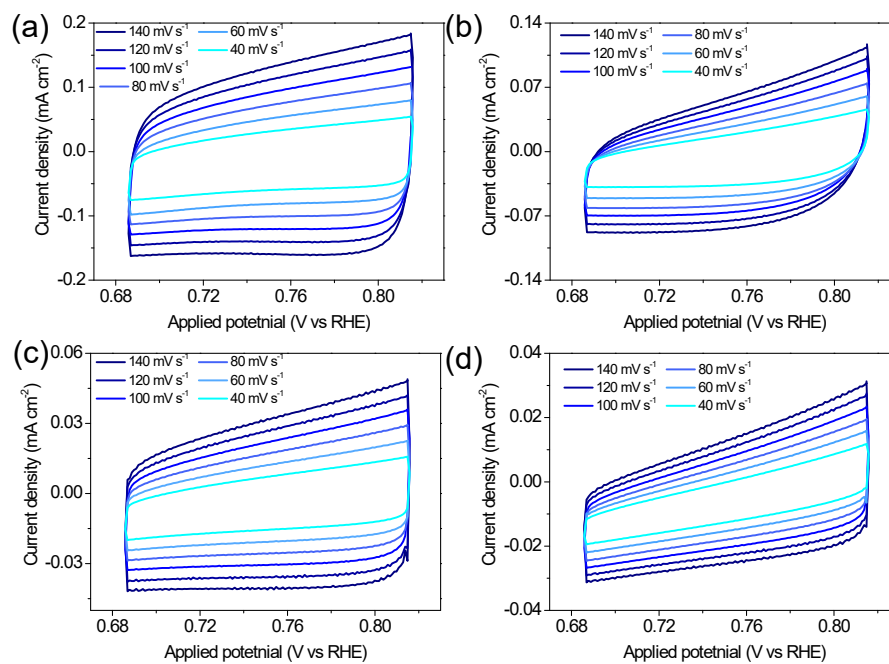

Figure S7. Cyclic voltammetry plots of (a) activated Ti-Ni, (b) IrO<sub>2</sub>, (c) prepared Ti-Ni, and (d) bare NF with a series of scan rates in the non-Faradaic region.

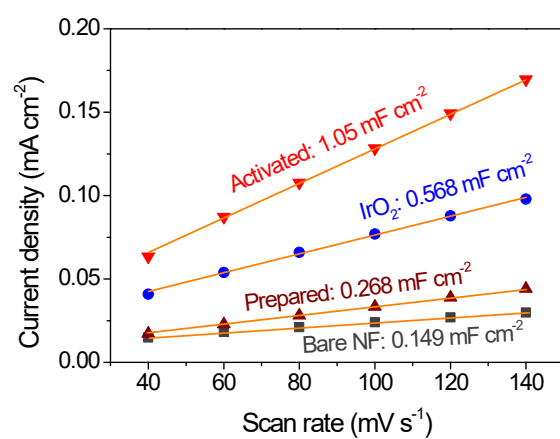

Figure S8. Linear fitting of capacitive currents against CV scan rates.

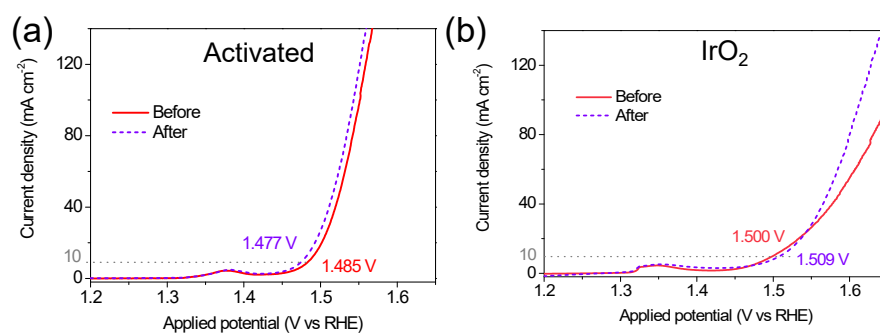

Figure S9. LSV plots of (a) activated Ti-Ni and (b) IrO<sub>2</sub> before and after stability test under 10 mA cm<sup>-2</sup> for 24 h.

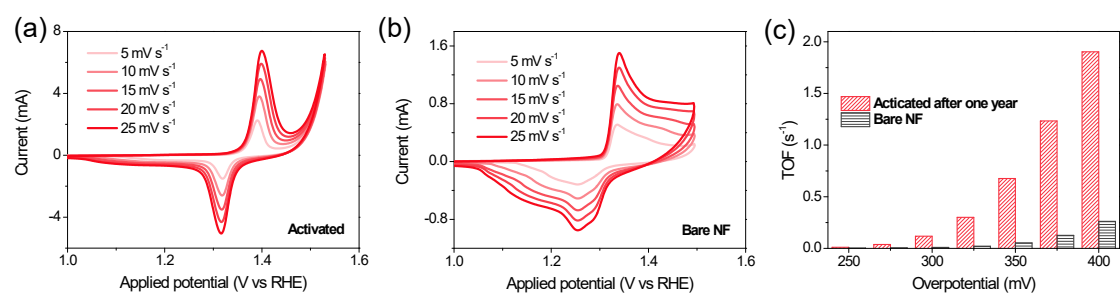

Figure S10. CV plots of (a) activated Ti-Ni and (b) bare NF. (c) Resulting TOF.

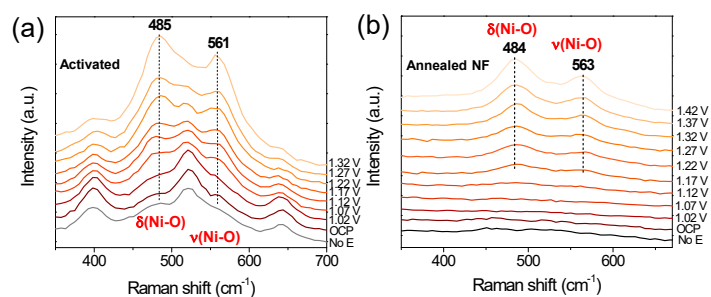

Figure S11. Local magnified Raman spectra in the range of 350-700  $\text{cm}^{-1}$  for the Ni region. (a) Activated Ti-Ni, (b) Annealed NF. OCP: open circuit potential was applied. No E: no potential was applied.

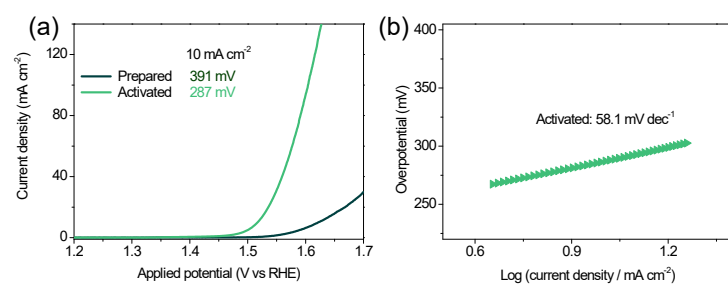

Figure S12. OER performance on prepared and activated Ti-Ni synthesized with commercial P25 nanoparticles instead of  $\text{TiO}_2$  nanosheets.

3. Table S1. Recent TiO<sub>2</sub> contained electrocatalysts for alkaline water oxidation.

| Catalyst                                                | Mass loading<br>(mg cm <sup>-2</sup> ) | Electrolyte                 | $\eta_{10}$ (mV) | $\eta_{100}$ (mV)   | $\eta_{1\text{-ECSA}}$<br>(mV) | Tafel slope<br>(mV dec <sup>-1</sup> ) | Retained /<br>durability test | Ref                                                                     |
|---------------------------------------------------------|----------------------------------------|-----------------------------|------------------|---------------------|--------------------------------|----------------------------------------|-------------------------------|-------------------------------------------------------------------------|
| Activated Ti-Ni                                         | 0.015                                  | 1.0 mol L <sup>-1</sup> KOH | 256              | 337                 | 282                            | 59                                     | 100% / 24 h<br>99.8% / 100 h  | This work                                                               |
| NiO/TiO <sub>2</sub>                                    | 0.34                                   | 1.0 mol L <sup>-1</sup> KOH | 320              | NM                  | NM                             | 52                                     | NM / 10 h                     | <i>J. Am. Chem. Soc.</i> <b>2016</b> , 138, 6517. <sup>5</sup>          |
| O <sub>V</sub> -TiO <sub>2</sub>                        | ~0.102 <sup>[a]</sup>                  | 1.0 mol L <sup>-1</sup> KOH | 600              | NM                  | NM                             | 51                                     | ~96% <sup>[a]</sup> / 36 h    | <i>J. Am. Chem. Soc.</i> <b>2016</b> , 138, 9978. <sup>6</sup>          |
| Rutile-anatase<br>TiO <sub>2</sub> /RGO                 | 0.25                                   | 1.0 mol L <sup>-1</sup> KOH | 283              | ~372 <sup>[a]</sup> | NM                             | 94                                     | ~98% <sup>[a]</sup> / 10 h    | <i>ChemNanoMat</i> , <b>2018</b> , 4, 1133-1139. <sup>7</sup>           |
| Co <sub>3</sub> O <sub>4</sub> (x)/Ism-TiO <sub>2</sub> | 0.8                                    | 1.0 mol L <sup>-1</sup> KOH | 348              | ~570 <sup>[a]</sup> | NM                             | 54                                     | 92% / 9 h                     | <i>Catalysts</i> <b>2019</b> , 9, 836. <sup>8</sup>                     |
| Co-TiO <sub>2</sub>                                     | 0.21 (12% Co)                          | 1.0 mol L <sup>-1</sup> KOH | 332              | 396                 | ~310 <sup>[a]</sup>            | 72                                     | 99% / 10 h                    | <i>Nature Catalysis</i> <b>2020</b> , 4, 36. <sup>9</sup>               |
| Fe-UTN                                                  | ~0.34 <sup>[a]</sup><br>(11.74% Fe)    | 1.0 mol L <sup>-1</sup> KOH | 270              | 376                 | NM                             | ~36.5 <sup>[a]</sup>                   | 92.3% / 10 h                  | <i>Angew. Chem. Int. Ed.</i> <b>2020</b> , 59, 2313-2317. <sup>10</sup> |
| Defective<br>RuO <sub>2</sub> /TiO <sub>2</sub>         | 1.19                                   | 1.0 mol L <sup>-1</sup> KOH | 296              | 358                 | NM                             | 46.6                                   | 20 h                          | <i>Chem. Eng. J.</i> <b>2022</b> , 431, 134072. <sup>11</sup>           |

Note: <sup>[a]</sup> calculated from the data from the corresponding literature.

## REFERENCES

- (1) Liu, C.; Zhang, A.-Y.; Si, Y.; Pei, D.-N.; Yu, H.-Q., Photochemical Anti-Fouling Approach for Electrochemical Pollutant Degradation on Facet-Tailored TiO<sub>2</sub> Single Crystals. *Environ. Sci. Technol.* **2017**, *51* (19), 11326-11335.
- (2) Song, Z.; Wang, K.; Sun, Q.; Zhang, L.; Li, J.; Li, D.; Sze, P.-W.; Liang, Y.; Sun, X.; Fu, X.-Z.; Luo, J.-L., High-Performance Ammonium Cobalt Phosphate Nanosheet Electrocatalyst for Alkaline Saline Water Oxidation. *Adv. Sci.* **2021**, *8* (14), 2100498.
- (3) Liu, P.; Chen, B.; Liang, C.; Yao, W.; Cui, Y.; Hu, S.; Zou, P.; Zhang, H.; Fan, H. J.; Yang, C., Tip-Enhanced Electric Field: A New Mechanism Promoting Mass Transfer in Oxygen Evolution Reactions. *Adv. Mater.* **2021**, *33* (9), 2007377.
- (4) Görlin, M.; Halldin Stenlid, J.; Koroidov, S.; Wang, H.-Y.; Börner, M.; Shipilin, M.; Kalinko, A.; Murzin, V.; Safonova, O. V.; Nachtegaal, M.; Uheida, A.; Dutta, J.; Bauer, M.; Nilsson, A.; Diaz-Morales, O., Key Activity Descriptors of Nickel-Iron Oxygen Evolution Electrocatalysts in the Presence of Alkali Metal Cations. *Nat. Commun.* **2020**, *11* (1), 6181.
- (5) Zhao, Y.; Jia, X.; Chen, G.; Shang, L.; Waterhouse, G. I.; Wu, L. Z.; Tung, C. H.; O'Hare, D.; Zhang, T., Ultrafine NiO Nanosheets Stabilized by TiO<sub>2</sub> from Monolayer NiTi-LDH Precursors: An Active Water Oxidation Electrocatalyst. *J. Am. Chem. Soc.* **2016**, *138* (20), 6517-6524.
- (6) Tao, H. B.; Fang, L. W.; Chen, J. Z.; Yang, H. B.; Gao, J. J.; Miao, J. W.; Chen, S. L.; Liu, B., Identification of Surface Reactivity Descriptor for Transition Metal Oxides in Oxygen Evolution Reaction. *J. Am. Chem. Soc.* **2016**, *138* (31), 9978-9985.

(7) Hu, Y. W.; Ding, T.; Zhang, K. L.; Li, B.; Zhu, B. C.; Tang, K. B., Component-Tunable Rutile-Anatase TiO<sub>2</sub>/Reduced Graphene Oxide Nanocomposites for Enhancement of Electrocatalytic Oxygen Evolution. *Chemnanomat* **2018**, *4* (11), 1133-1139.

(8) Amer, M. S.; Ghanem, M. A.; Arunachalam, P.; Al-Mayouf, A. M.; Hadadi, S. M., Bifunctional Electrocatalyst of Low-Symmetry Mesoporous Titanium Dioxide Modified with Cobalt Oxide for Oxygen Evolution and Reduction Reactions. *Catalysts* **2019**, *9* (10), 836.

(9) Liu, C.; Qian, J.; Ye, Y.; Zhou, H.; Sun, C.-J.; Sheehan, C.; Zhang, Z.; Wan, G.; Liu, Y.-S.; Guo, J.; Li, S.; Shin, H.; Hwang, S.; Gunnoe, T. B.; Goddard, W. A.; Zhang, S., Oxygen Evolution Reaction over Catalytic Single-Site Co in a Well-Defined Brookite TiO<sub>2</sub> Nanorod Surface. *Nat. Catal.* **2020**, *4* (1), 36-45.

(10) Shen, G. Q.; Zhang, R. R.; Pan, L.; Hou, F.; Zhao, Y. J.; Shen, Z. Y.; Mi, W. B.; Shi, C. X.; Wang, Q. F.; Zhang, X. W.; Zou, J. J., Regulating the Spin State of Fe<sup>III</sup> by Atomically Anchoring on Ultrathin Titanium Dioxide for Efficient Oxygen Evolution Electrocatalysis. *Angew. Chem. Int. Ed.* **2020**, *59* (6), 2313-2317.

(11) Yu, J. Y.; Wang, X. D.; Huang, X. W.; Cao, J. Y.; Huo, Q. H.; Mi, L. R.; Yang, H. P.; Hu, Q.; He, C. X., Confining Ultrafine Ru Clusters into TiO<sub>2</sub> Lattice Frameworks to Yield Efficient and Ultrastable Electrocatalysts Towards Practical Hydrogen Evolution. *Chem. Eng. J.* **2022**, *446* 137248.
